1 ***fruitless* tunes functional flexibility of courtship circuitry during development**

2

3 Jie Chen <sup>1</sup>, Sihui Jin <sup>1</sup>, Jie Cao <sup>1</sup>, Qionglin Peng <sup>1</sup>, Yufeng Pan <sup>1,2,\*</sup>

4

5

6 <sup>1</sup>The Key Laboratory of Developmental Genes and Human Disease, School of Life

7 Science and Technology, Southeast University, Nanjing, 210096, China.

8 <sup>2</sup>Co-innovation Center of Neuroregeneration, Nantong University, Nantong, 226019,

9 China.

10

11 \*Correspondence to: [pany@seu.edu.cn](mailto:pany@seu.edu.cn) (Y. P.)

12

13

14 **ABSTRACT**

15• *Drosophila* male courtship is controlled by the male-specific products of the *fruitless*  
16 (*fru<sup>M</sup>*) gene and its expressing neuronal circuitry. *fru<sup>M</sup>* is considered a master gene that  
17 controls all aspects of male courtship. By temporally and spatially manipulating *fru<sup>M</sup>*  
18 expression, we found that *fru<sup>M</sup>* is required during a critical developmental period for  
19 innate courtship towards females, and its function during adulthood is relatively  
20 trivial. By altering or eliminating *fru<sup>M</sup>* expression, we generated males that are  
21 innately heterosexual, homosexual, bisexual, or without innate courtship but could  
22 acquire such behavior in an experience-dependent manner. These findings show that  
23 *fru<sup>M</sup>* is not absolutely necessary for courtship but is critical during development to  
24 build a sex circuitry with reduced flexibility and enhanced efficiency and provide a  
25 new view about how *fru<sup>M</sup>* tunes functional flexibility of a sex circuitry.

26•

27• **Keywords:**

28• *Drosophila*; courtship; innate behavior; fruitless; circuit flexibility; sexual orientation

29

## 30 **Introduction**

31

32 *Drosophila* male courtship is one of the best understood innate behaviors in terms of  
33 genetic and neuronal mechanisms (Dickson, 2008; Yamamoto and Koganezawa,  
34 2013). It has been well established that the *fruitless* (*fru*) gene and its expressing  
35 neurons control most aspects of such innate behavior (Ito et al., 1996; Manoli et al.,  
36 2005; Ryner et al., 1996; Stockinger et al., 2005). The male-specific products of the  
37 P1 promoter of the *fru* gene (*fru<sup>M</sup>*) are expressed in ~2000 neurons, which are inter-  
38 connected to form a sex circuitry from sensory neurons to motor neurons (Cachero et  
39 al., 2010; Lee et al., 2000; Manoli et al., 2005; Stockinger et al., 2005; Usui-Aoki et  
40 al., 2000; Yu et al., 2010). *fru<sup>M</sup>* function is necessary for the innate courtship behavior  
41 and sufficient for at least some aspects of courtship (Baker et al., 2001; Demir and  
42 Dickson, 2005; Manoli et al., 2005). Thus, the study of *fru<sup>M</sup>* function in controlling  
43 male courtship serves as an ideal model to understand how innate complex behaviors  
44 are built into the nervous system by regulatory genes (Baker et al., 2001).

45 Although *fru<sup>M</sup>* serves as a master gene controlling *Drosophila* male courtship, we  
46 recently found that males without *fru<sup>M</sup>* function, although do not court if raised in  
47 isolation, were able to acquire at least some courtship behaviors if raised in groups  
48 (Pan and Baker, 2014). Such *fru<sup>M</sup>*-independent but experience-dependent courtship  
49 acquisition requires another gene in the sex determination pathway, the *doublesex*  
50 (*dsx*) gene (Pan and Baker, 2014). *dsx* encodes male- and female-specific DSX

51 proteins (DSX<sup>M</sup> and DSX<sup>F</sup>, respectively) (Burtis and Baker, 1989), and DSX<sup>M</sup> is  
52 expressed in ~700 CNS neurons, the majority of which also express *fru*<sup>M</sup> (Rideout et  
53 al., 2010; Robinett et al., 2010). It has been found that the *fru*<sup>M</sup> and *dsx*<sup>M</sup> co-  
54 expressing neurons are required for courtship in the absence of *fru*<sup>M</sup> function (Pan and  
55 Baker, 2014). Thus *fru*<sup>M</sup>-expressing neurons, especially those co-expressing *dsx*<sup>M</sup>,  
56 control the expression of courtship behaviors even in the absence of FRU<sup>M</sup> function.  
57 Indeed, although the gross neuroanatomical features of the *fru*<sup>M</sup>-expressing circuitry  
58 are largely unaffected by the loss of *fru*<sup>M</sup>, detailed analysis revealed morphological  
59 changes of many *fru*<sup>M</sup>-expressing neurons (Kimura et al., 2005; Kimura et al., 2008;  
60 Mellert et al., 2010). Recent studies further reveal that FRU<sup>M</sup> specifies neuronal  
61 development by recruiting chromatin factors and changing chromatin states, and also  
62 by turning on and off the activity of the transcription repressor complex (Ito et al.,  
63 2012; Ito et al., 2016; Sato et al., 2019a; Sato et al., 2019b; Sato and Yamamoto,  
64 2020).

65 That FRU<sup>M</sup> functions as a transcription factor to specify development and/or  
66 physiological roles of certain *fru*<sup>M</sup>-expressing neurons, and perhaps the  
67 interconnection of different *fru*<sup>M</sup>-expressing neurons to form a sex circuitry raises  
68 important questions regarding when *fru*<sup>M</sup> functions and how it contributes to the sex  
69 circuitry (*e.g.*, how the sex circuitry functions differently with different levels of  
70 FRU<sup>M</sup>), especially in the background that *fru*<sup>M</sup> is not absolutely necessary for male  
71 courtship (Pan and Baker, 2014). To at least partially answer these questions, we

72 temporally or spatially knocked down *fru<sup>M</sup>* expression, and compared courtship  
73 behavior in these males with that in wild-type males or *fru<sup>M</sup>* null males and revealed  
74 crucial roles of *fru<sup>M</sup>* during a narrow developmental window for the innate courtship  
75 towards females. We also found that the sex circuitry with different *fru<sup>M</sup>* expression  
76 has distinct function such that males could be innately heterosexual, homosexual,  
77 bisexual, or without innate courtship but could acquire such behavior in an  
78 experience-dependent manner. Thus, *fru<sup>M</sup>* tunes functional flexibility of the sex  
79 circuitry instead of switching on its function as conventionally viewed.

80

81

## 82 **Results**

83

84 To specifically knock down *fru<sup>M</sup>* expression, we used a microRNA targeting *fru<sup>M</sup>*  
85 (*UAS-fruMi*) and a scrambled version as a control (*UAS-fruMiScr*) as previously used  
86 (Chen et al., 2017). We firstly tested male courtship without food in the behavioral  
87 chamber. Knocking down *fru<sup>M</sup>* in all the *fru<sup>GAL4</sup>* labeled neurons eliminated male  
88 courtship towards females (courtship index [CI], which is the percentage of  
89 observational time that males displayed courtship, is nearly 0) (Figure 1A), consistent  
90 with previous findings that *fru<sup>M</sup>* is required for innate male-female courtship (Demir  
91 and Dickson, 2005; Pan and Baker, 2014). We then added a temperature dependent  
92 *tub-GAL80<sup>ts</sup>* transgene to restrict *UAS-fruMi* expression (e.g., at 30°C) at different

93 developmental stages. We raised *tub-GAL80<sup>ts/+</sup>; fru<sup>GAL4</sup>/UAS-fruMi* flies at 18°C  
94 (permissive for GAL80<sup>ts</sup> that inhibits GAL4 activity) and transferred these flies to  
95 fresh food vials every two days. In this way we generated *tub-GAL80<sup>ts/+</sup>;*  
96 *fru<sup>GAL4</sup>/UAS-fruMi* flies at 9 different stages from embryos to adults and incubated all  
97 flies at 30°C to allow *fru<sup>M</sup>* knock-down for 2 days, then placed all flies back to 18°C  
98 until courtship test (Figure 1B). We found that males with *fru<sup>M</sup>* knocked down from  
99 stage 5 to 6, matching the pupation phase, rarely courted (CI < 10%) and none  
100 successfully mated, while males with *fru<sup>M</sup>* knocked down near this period showed a  
101 partial courtship deficit (Figure 1C, D). Knocking down *fru<sup>M</sup>* specifically during  
102 adulthood for 2 days did not affect male courtship (CI > 80%) and mating success.  
103 These results reveal a critical developmental period where *fru<sup>M</sup>* is required for adult  
104 male courtship towards females.

105 As we did not see an obvious courtship deficit in males with *fru<sup>M</sup>* knocked down  
106 in adulthood for 2 days, we further tested the role of *fru<sup>M</sup>* in adulthood using different  
107 approaches. We set out to express the female-specific *transformer (traF)* gene (Baker  
108 and Ridge, 1980; McKeown et al., 1988) to feminize all *fru<sup>GAL4</sup>* labeled neurons, in  
109 addition to the *fru<sup>M</sup>* RNAi experiments. We express *UAS-traF* or *UAS-fruMi* in all the  
110 *fru<sup>GAL4</sup>* labeled neurons specifically during adulthood for 4 days before test (see  
111 procedure above each figure) for single-pair male-female, male-male, and male  
112 chaining (in groups of 8 males) behaviors. We found that overexpression of *traF* in all  
113 *fru<sup>GAL4</sup>* labeled neurons during adulthood for 4 days did not affect male-female

114 courtship (Figure 1E), but slightly increased male-male (Figure 1F) and male chaining  
115 behaviors (Figure 1G). Furthermore, knocking down *fru<sup>M</sup>* in all *fru<sup>GAL4</sup>* labeled  
116 neurons during adulthood for 4 days did not affect male-female (Figure 1E) or male-  
117 male courtship (Figure 1F), but slightly increased male chaining behaviors (Figure  
118 1G). Together these results indicate that *fru<sup>M</sup>* function during pupation is crucial for  
119 adult courtship towards females, while its function during adulthood is dispensable  
120 for female-directed courtship, though it plays a minor role in inhibiting male-male  
121 courtship behaviors.

122 To further reveal the role of *fru<sup>M</sup>* in male courtship, we tried to spatially knock  
123 down *fru<sup>M</sup>* expression using a simple way: *fru<sup>M</sup>* in brain and *fru<sup>M</sup>* outside brain. We  
124 used *Otd-Flp* expressing FLP specifically in the central brain (Asahina et al., 2014) to  
125 divide *fru<sup>GAL4</sup>* expression (Figure 2A) into two parts: *fru<sup>M</sup>*- and *Otd*-positive neurons  
126 (specifically in brain) in *Otd-Flp/UAS-myrGFP; fru<sup>GAL4</sup>/tub>GAL80* males (Figure  
127 2B), and *fru<sup>M</sup>*-positive but *Otd*-negative neurons (theoretically outside brain, but still  
128 with few in brain) in *Otd-Flp/UAS-myrGFP; fru<sup>GAL4</sup>/tub>stop>GAL80* males (Figure  
129 2C). We also checked GFP expression in peripheral nervous system in these males,  
130 and found a few GFP-positive cells in antennae and forelegs in *Otd-Flp/UAS-*  
131 *myrGFP; fru<sup>GAL4</sup>/tub>stop>GAL80* males, but no expression in *Otd-Flp/UAS-*  
132 *myrGFP; fru<sup>GAL4</sup>/tub>GAL80* or wild-type males (Figure 2D-G). Thus, we  
133 successfully divided *fru<sup>GAL4</sup>* expression into two categories, one with *GAL4* expressed

134 in *fru*<sup>+</sup>*Otd*<sup>+</sup> neurons in brain, and the other with *GAL4* expressed in *fru*<sup>+</sup>*Otd*<sup>+</sup> neurons  
135 outside brain.

136 We then used the above intersectional strategy to knock down *fru*<sup>M</sup> expression  
137 in all *fru*<sup>GAL4</sup> neurons or those neurons in or outside brain, and compared male  
138 courtship with that in wild-type males and *fru*<sup>M</sup> null males. We tested one-time single-  
139 pair male-female and male-male courtship (single-housed before test) as well as male  
140 chaining in groups of 8 males over 3 days on food for better comparison of these  
141 courtship assays, as courtship by *fru*<sup>M</sup> null males largely depends on food presence  
142 (Pan and Baker, 2014). We found that male-male courtship in *fru*<sup>M</sup> knocked down  
143 males is higher if tested on food, consistent with a courtship promoting role by food  
144 (Grosjean et al., 2011; Pan and Baker, 2014), while courtship in wild-type males on  
145 food or without food is not changed in our assays (Figure 3—figure supplement 1).  
146 We found that wild-type males performed intensive courtship behavior towards virgin  
147 females (CI > 80%) and rarely courted males (CI ~0) (Figure 3A). Furthermore, these  
148 control males did not show any chaining behavior after grouping from 3 hours to 3  
149 days (ChI = 0) (Figure 3B). In striking contrast, *fru*<sup>M</sup> null mutant (*fru*<sup>LexA</sup>/*fru*<sup>4-40</sup>) males  
150 rarely courted either females or males (Figure 3C); however, these males developed  
151 intensive chaining behavior after grouping for 1-3 days (Figure 3D). These  
152 observations replicated previous findings that there exists a *fru*<sup>M</sup>-independent  
153 experience- and *dsx*<sup>M</sup>-dependent courtship pathway (Pan and Baker, 2014) (Figure  
154 3E). To compare behavioral differences by *fru*<sup>M</sup> null males and *fru*<sup>M</sup> RNAi knocked



155 down males, we quantified to how much extent the microRNA against *fru<sup>M</sup>* worked.

156 We found that the *fru<sup>M</sup>* mRNA level was reduced to ~40% of that in control males

157 (Figure 3F). Interestingly, while males with *fru<sup>M</sup>* knocked down in all *fru<sup>M</sup>* neurons

158 rarely courted females (CI~5%, Figure 3G), they displayed a high level of male-male

159 courtship behavior (CI > 50%, Figure 3G) and constantly high level of male chaining

160 (Figure 3H), dramatically different from *fru<sup>M</sup>* null males. These results reveal distinct

161 roles of low *fru<sup>M</sup>* (RNAi) and high *fru<sup>M</sup>* (wild-type) in regulating male-male and male-

162 female courtship (Figure 3I). To further dissect the role of *fru<sup>M</sup>* in male courtship, we

163 knocked down *fru<sup>M</sup>* specifically in brain, and found that such males had a reduced

164 level of courtship towards females (CI =  $56.61 \pm 5.86\%$ ), but their sexual orientation

165 was not changed as they courted males in a much lower level (CI =  $15.94 \pm 3.26\%$ ,

166 Figure 3J). Furthermore, males with *fru<sup>M</sup>* knocked down in brain showed low male

167 chaining behavior initially but increasing levels of chaining behavior over 1-3 days

168 (ChI[3h] =  $9.35 \pm 5.40\%$ , ChI[3d] =  $68.82 \pm 5.53\%$ , Figure 3K). These results

169 indicate that *fru<sup>M</sup>* function in brain promotes male-female courtship and inhibits

170 acquisition or progression of the experience-dependent chaining behavior (Figure 3L).

171 In contrast, males with *fru<sup>M</sup>* knocked down outside brain showed equally intensive

172 male-female and male-male courtship (CI[male-female] =  $85.62 \pm 1.42\%$ , CI[male-

173 male] =  $82.89 \pm 2.76\%$ , Figure 3M), indicating an inhibitory role of *fru<sup>M</sup>* in these

174 neurons for male-male courtship (Figure 3O). These males performed a high level of

175 male chaining behavior initially (ChI[3h] =  $92.90 \pm 3.08\%$ ), but decreased levels of

176 chaining behavior over 1-3 days ( $\text{ChI}[3\text{d}] = 20.01 \pm 3.75\%$ , Figure 3N), consistent  
177 with the above finding that *f<sup>ru</sup><sup>M</sup>* function in the brain which is intact in these males  
178 inhibits acquisition or progression of male chaining behavior (Figure 3L).

179 Taken together, the above results indicate crucial role of *f<sup>ru</sup><sup>M</sup>* expression level  
180 during a critical developmental period for the manifestation of courtship behaviors  
181 and reveal functional flexibility of the *f<sup>ru</sup><sup>M</sup>*-expressing sex circuitry (Figure 4).

182

183

## 184 **Discussion**

185

186 Previous findings show that *f<sup>ru</sup><sup>M</sup>* expression commences at the wandering third instar  
187 larval stage, peaks at the pupal stage, and thereafter declines but does not disappear  
188 after eclosion (Lee et al., 2000), which suggests that *f<sup>ru</sup><sup>M</sup>* may function mainly during  
189 development for adult courtship behavior despite of no direct evidence. Here we  
190 temporally knocked down *f<sup>ru</sup><sup>M</sup>* expression in different developmental stages for 2  
191 days and found that males with *f<sup>ru</sup><sup>M</sup>* knocked down during pupation rarely courted,  
192 while males with *f<sup>ru</sup><sup>M</sup>* knocked down during adulthood courted normally towards  
193 females. This is the first direct evidence that *f<sup>ru</sup><sup>M</sup>* is required during development but  
194 not adulthood for courtship behavior. However, we also found a minor role of *f<sup>ru</sup><sup>M</sup>*  
195 during adulthood in suppressing male-male courtship, as males with *f<sup>ru</sup><sup>M</sup>* knocked  
196 down or *tra* overexpressed during adulthood displayed slightly enhanced male-male

197 courtship or male chaining behaviors. Note that a previous study found that removal  
198 of *transformer 2 (tra2)* specifically during adulthood using a temperature sensitive  
199 *tra2* allele induced 8 out of 96 females to show male-type courtship behaviors (Belote  
200 and Baker, 1987), which suggests that expression of FRU<sup>M</sup> and DSX<sup>M</sup> (by removal of  
201 *tra2* function in females) during adulthood is sufficient to masculinize CNS to some  
202 extent and induce a small fraction of females to display courtship behaviors. A recent  
203 study also found that *fru*<sup>M</sup> expression in the *Or47b*-expressing olfactory receptor  
204 neurons depends on the activity of these neurons during adulthood (Hueston et al.,  
205 2016). Based on all these findings, we propose that *fru*<sup>M</sup> expression during pupation is  
206 crucial for specifying a sex circuitry that allows innate courtship towards females, and  
207 its expression during adulthood may be activity-dependent in at least some neurons  
208 and modulates some aspects of courtship (e.g., inhibits male-male courtship). Thus,  
209 there are at least two separate mechanisms that *fru*<sup>M</sup> contributes to the sex circuitry,  
210 one during a critical developmental period to build the female-directed innate  
211 courtship into that circuitry, and the other during adulthood to modulate neuronal  
212 physiology in an experience-dependent manner.

213 Most importantly, we revealed striking flexibility of the fly sex circuitry by  
214 manipulating *fru*<sup>M</sup> expression. We listed four cases with *fru*<sup>M</sup> manipulation here for  
215 comparison: (1) males with a sex circuitry having wild-type *fru*<sup>M</sup> function have innate  
216 heterosexual courtship, as they court readily towards females, but do not court males  
217 no matter how long they meet; (2) males with a sex circuitry having no *fru*<sup>M</sup> function

218 lose the innate courtship ability, but have the potential to acquire courtship towards  
219 males, females, and even other species in an experience-dependent manner; (3) males  
220 with a sex circuitry having limited *fru<sup>M</sup>* expression (e.g., 40%) have innate  
221 homosexual courtship, as they court readily towards other males, but rarely court  
222 females; (4) males with a sex circuitry having limited *fru<sup>M</sup>* expression outside brain  
223 (but intact *fru<sup>M</sup>* expression in brain) are innately bisexual, as they court equally  
224 towards females or males. Although previous studies found that different *fru<sup>M</sup>* alleles  
225 (e.g., deletions, inversions or insertions related to *fru*) showed very different courtship  
226 abnormalities (Anand et al., 2001; Vilella et al., 1997), it was very hard to link *fru<sup>M</sup>*  
227 function to the flexibility of sex circuitry, and often seen as allele-specific or  
228 background-dependent phenotypes. Our study using relatively simple genetic  
229 manipulations that generate dramatical different courtship behaviors promoted us to  
230 speculate a different view about the role of *fru<sup>M</sup>*: instead of simply being a master  
231 gene that controls all aspects of male courtship, *fru<sup>M</sup>* is not absolutely necessary for  
232 courtship, but changes the wiring of the sex circuitry during development such that  
233 the sex circuitry may function in very different ways, ranging from innately  
234 heterosexual, homosexual, bisexual to largely experience-dependent acquisition of the  
235 behavior. Such flexibility of the sex circuitry is tuned by different *fru<sup>M</sup>* expression,  
236 such that changes of *fru<sup>M</sup>* regulatory regions during evolution would easily select a  
237 suitable functional mode of the sex circuitry.

238

239

## 240 **Materials and methods**

241

### 242 **Fly Stocks**

243 Flies were maintained at 22 or 25°C in a 12 h:12 h light:dark cycle. Canton-S flies

244 were used as the wild-type strain. Other stocks used in this study include the

245 following: *fru*<sup>GAL4</sup> (Stockinger et al., 2005), *UAS-fruMi* and *UAS-fruMiScr* (Meissner

246 et al., 2016), *fru*<sup>LexA</sup> and *fru*<sup>4-40</sup> (Pan and Baker, 2014) and *Otd-Flp* (Asahina et al.,

247 2014). *UAS-traF* (BL#4590), *tub-GAL80<sup>ts</sup>* (BL#7019), *tub>GAL80>* (BL#38881)

248 and *tub>stop>GAL80* (BL#39213) were from Bloomington Drosophila Stock

249 Center.

250

### 251 **Courtship and Chaining Assays**

252 For the single-pair courtship assay, the tester males and target flies (4-8 days old)

253 were gently aspirated into round 2-layer chambers (diameter: 1 cm; height: 3 mm per

254 layer) and were separated by a plastic transparent barrier that was removed ~30 min

255 later to allow courtship test. Courtship index (CI), which is the percentage of

256 observation time a fly performs any courtship step, was used to measure courtship to

257 female targets or between 2 males. Paired male-male courtship used 2 males of the

258 same genotype but focused on the male fly that first initiated courtship (courtship of

259 the initiator to the other). All tester flies were single housed if not otherwise

260 mentioned. Each test was performed for 10 min.

261 For male chaining assay, tester males (4-8 days old) were loaded into large round  
262 chambers (diameter: 4 cm; height: 3 mm) by cold anesthesia. Tests were performed  
263 daily for 4 consecutive days (3 hours after grouping as day 0, then days 1–3).

264 Chaining index (ChI), which is the percentage of observation time at least 3 flies  
265 engaged in courtship together, was used to measure courtship in groups of 8 males.

266

## 267 **Immunohistochemistry**

268 We dissected brains and ventral nerve cords of 5-7 days old males in Schneider's  
269 insect medium (Thermo Fisher Scientific, Waltham, MA) and fixed in 4%  
270 paraformaldehyde (PFA) in phosphate-buffered saline (PBS) for 30 min at room  
271 temperature. After washing four times in PAT (0.5% Triton X-100 and 0.5% bovine  
272 serum albumin in PBS), tissues were blocked in 3% normal goat serum (NGS) for 60  
273 min, then incubated in primary antibodies diluted in 3% NGS for ~24 hr at 4°C,  
274 washed (4 × 15-min) in PAT at room temperature, and incubated in secondary  
275 antibodies diluted in 3% NGS for ~24 hr at 4°C. Tissues were then washed (4 × 15-  
276 min) in PAT and mounted in Vectorshield (Vector Laboratories, Burlingame, CA) for  
277 imaging. Primary antibodies used were rabbit anti-GFP (1:1000; A11122, Invitrogen,  
278 Waltham, MA) and mouse anti-Bruchpilot (1:50; nc82, Developmental Studies  
279 Hybridoma Bank, Iowa City, IA). Secondary antibodies used were goat anti-mouse

280 IgG conjugated to Alexa 555 (1:500, A28180, Invitrogen) and goat anti-rabbit IgG  
281 conjugated to Alexa 488 (1:500, A11008, Invitrogen). Samples were imaged at 10× or  
282 20× magnification on a Zeiss 700 confocal microscope and processed with ImageJ.

283

## 284 **Statistics**

285 Experimental flies and genetic controls were tested at the same condition, and data are  
286 collected from at least two independent experiments. Statistical analysis is performed  
287 using GraphPad Prism and indicated inside each figure legend. Data presented in this  
288 study were first verified for normal distribution by D'Agostino–Pearson normality  
289 test. If normally distributed, Student's *t* test is used for pairwise comparisons, and  
290 one-way ANOVA is used for comparisons among multiple groups, followed by  
291 Tukey's multiple comparisons. If not normally distributed, Mann-Whitney U test is  
292 used for pairwise comparisons, and Kruskal-Wallis test is used for comparisons  
293 among multiple groups, followed by Dunn's multiple comparisons.

294

295

## 296 **Acknowledgements**

297

298 We thank the Bloomington Drosophila Stock Center for fly stocks. This work was  
299 supported by grants from National Key R&D Program of China (2019YFA0802400),

300 the National Natural Science Foundation of China (31970943 and 31622028), and the  
301 Jiangsu Innovation and Entrepreneurship Team Program.

302

303

## 304 **References**

305

306 Anand, A., Villella, A., Ryner, L.C., Carlo, T., Goodwin, S.F., Song, H.J., Gailey, D.A.,  
307 Morales, A., Hall, J.C., Baker, B.S., Taylor, B.J., 2001. Molecular genetic dissection  
308 of the sex-specific and vital functions of the *Drosophila melanogaster* sex  
309 determination gene *fruitless*. *Genetics* 158, 1569-1595.

310 Asahina, K., Watanabe, K., Duistermars, B.J., Hoopfer, E., Gonzalez, C.R.,  
311 Eyjolfsson, E.A., Perona, P., Anderson, D.J., 2014. Tachykinin-expressing neurons  
312 control male-specific aggressive arousal in *Drosophila*. *Cell* 156, 221-235.

313 Baker, B.S., Ridge, K.A., 1980. Sex and the single cell. I. On the action of major loci  
314 affecting sex determination in *Drosophila melanogaster*. *Genetics* 94, 383-423.

315 Baker, B.S., Taylor, B.J., Hall, J.C., 2001. Are Complex Behaviors Specified by  
316 Dedicated Regulatory Genes? Reasoning from *Drosophila*. *Cell* 105, 13-24.

317 Belote, J.M., Baker, B.S., 1987. Sexual behavior: its genetic control during  
318 development and adulthood in *Drosophila melanogaster*. *Proc Natl Acad Sci U S*  
319 *A* 84, 8026-8030.

320 Burtis, K.C., Baker, B.S., 1989. *Drosophila* doublesex gene controls somatic sexual  
321 differentiation by producing alternatively spliced mRNAs encoding related sex-  
322 specific polypeptides. *Cell* 56, 997-1010.

323 Cachero, S., Ostrovsky, A.D., Yu, J.Y., Dickson, B.J., Jefferis, G.S., 2010. Sexual  
324 dimorphism in the fly brain. *Current biology : CB* 20, 1589-1601.

325 Chen, D., Sitaraman, D., Chen, N., Jin, X., Han, C., Chen, J., Sun, M., Baker, B.S.,  
326 Nitabach, M.N., Pan, Y., 2017. Genetic and neuronal mechanisms governing the  
327 sex-specific interaction between sleep and sexual behaviors in *Drosophila*. *Nature*  
328 *communications* 8, 154.

329 Demir, E., Dickson, B.J., 2005. *fruitless* splicing specifies male courtship behavior in  
330 *Drosophila*. *Cell* 121, 785-794.

331 Dickson, B.J., 2008. Wired for sex: the neurobiology of *Drosophila* mating  
332 decisions. *Science* 322, 904-909.

333 Grosjean, Y., Rytz, R., Farine, J.P., Abuin, L., Cortot, J., Jefferis, G.S., Benton, R., 2011.  
334 An olfactory receptor for food-derived odours promotes male courtship in  
335 *Drosophila*. *Nature* 478, 236-240.

336 Hueston, C.E., Olsen, D., Li, Q., Okuwa, S., Peng, B., Wu, J., Volkan, P.C., 2016.



337 Chromatin Modulatory Proteins and Olfactory Receptor Signaling in the  
338 Refinement and Maintenance of Fruitless Expression in Olfactory Receptor  
339 Neurons. *PLoS Biol* 14, e1002443.

340 Ito, H., Fujitani, K., Usui, K., Shimizu-Nishikawa, K., Tanaka, S., Yamamoto, D., 1996.  
341 Sexual orientation in *Drosophila* is altered by the satori mutation in the sex-  
342 determination gene fruitless that encodes a zinc finger protein with a BTB domain.  
343 *Proceedings of the National Academy of Sciences* 93, 9687-9692.

344 Ito, H., Sato, K., Koganezawa, M., Ote, M., Matsumoto, K., Hama, C., Yamamoto,  
345 D., 2012. Fruitless recruits two antagonistic chromatin factors to establish single-  
346 neuron sexual dimorphism. *Cell* 149, 1327-1338.

347 Ito, H., Sato, K., Kondo, S., Ueda, R., Yamamoto, D., 2016. Fruitless Represses robo1  
348 Transcription to Shape Male-Specific Neural Morphology and Behavior in  
349 *Drosophila*. *Current biology : CB* 26, 1532-1542.

350 Kimura, K., Ote, M., Tazawa, T., Yamamoto, D., 2005. Fruitless specifies sexually  
351 dimorphic neural circuitry in the *Drosophila* brain. *Nature* 438, 229-233.

352 Kimura, K.-i., Hachiya, T., Koganezawa, M., Tazawa, T., Yamamoto, D., 2008.  
353 Fruitless and Doublesex Coordinate to Generate Male-Specific Neurons that Can  
354 Initiate Courtship. *Neuron* 59, 759-769.

355 Lee, G., Foss, M., Goodwin, S.F., Carlo, T., Taylor, B.J., Hall, J.C., 2000. Spatial,  
356 temporal, and sexually dimorphic expression patterns of the fruitless gene in  
357 the *Drosophila* central nervous system. *Journal of Neurobiology* 43, 404-426.

358 Manoli, D.S., Foss, M., Villella, A., Taylor, B.J., Hall, J.C., Baker, B.S., 2005. Male-  
359 specific fruitless specifies the neural substrates of *Drosophila* courtship behaviour.  
360 *Nature* 436, 395-400.

361 McKeown, M., Belote, J.M., Boggs, R.T., 1988. Ectopic expression of the female  
362 transformer gene product leads to female differentiation of chromosomally male  
363 *drosophila*. *Cell*,53(6), 887-895.

364 Meissner, G.W., Luo, S.D., Dias, B.G., Texada, M.J., Baker, B.S., 2016. Sex-specific  
365 regulation of Lgr3 in *Drosophila* neurons. *Proc Natl Acad Sci U S A* 113, E1256-  
366 1265.

367 Mellert, D.J., Knapp, J.M., Manoli, D.S., Meissner, G.W., Baker, B.S., 2010. Midline  
368 crossing by gustatory receptor neuron axons is regulated by fruitless, doublesex  
369 and the Roundabout receptors. *Development* 137, 323-332.

370 Pan, Y., Baker, B.S., 2014. Genetic identification and separation of innate and  
371 experience-dependent courtship behaviors in *Drosophila*. *Cell* 156, 236-248.

372 Rideout, E.J., Dornan, A.J., Neville, M.C., Eadie, S., Goodwin, S.F., 2010. Control of  
373 sexual differentiation and behavior by the doublesex gene in *Drosophila*  
374 *melanogaster*. *Nat Neurosci* 13, 458-466.

375 Robinett, C.C., Vaughan, A.G., Knapp, J.M., Baker, B.S., 2010. Sex and the single  
376 cell. II. There is a time and place for sex. *PLoS Biol* 8, e1000365.

377 Ryner, L.C., Goodwin, S.F., Castrillon, D.H., Anand, A., Villella, A., Baker, B.S., Hall,  
378 J.C., Taylor, B.J., Wasserman, S.A., 1996. Control of male sexual behavior and

- 379 sexual orientation in *Drosophila* by the fruitless gene. *Cell* 87, 1079-1089.
- 380 Sato, K., Goto, J., Yamamoto, D., 2019a. Sex Mysteries of the Fly Courtship Master  
381 Regulator Fruitless. *Front Behav Neurosci* 13, 245.
- 382 Sato, K., Ito, H., Yokoyama, A., Toba, G., Yamamoto, D., 2019b. Partial proteasomal  
383 degradation of Lola triggers the male-to-female switch of a dimorphic courtship  
384 circuit. *Nature communications* 10, 166.
- 385 Sato, K., Yamamoto, D., 2020. The mode of action of Fruitless: Is it an easy matter  
386 to switch the sex? *Genes Brain Behav* 19, e12606.
- 387 Stockinger, P., Kvitsiani, D., Rotkopf, S., Tirián, L., Dickson, B.J., 2005. Neural  
388 Circuitry that Governs *Drosophila* Male Courtship Behavior. *Cell* 121, 795-807.
- 389 Usui-Aoki, K., Ito, H., Ui-Tei, K., Takahashi, K., Lukacsovich, T., Awano, W., Nakata,  
390 H., Piao, Z.F., Nilsson, E.E., Tomida, J.-y., Yamamoto, D., 2000. Formation of the  
391 male-specific muscle in female *Drosophila* by ectopic fruitless expression. *Nature*  
392 *Cell Biology* 2, 500-506.
- 393 Villella, A., Gailey, D.A., Berwald, B., Ohshima, S., Barnes, P.T., Hall, J.C., 1997.  
394 Extended reproductive roles of the fruitless gene in *Drosophila melanogaster*  
395 revealed by behavioral analysis of new fru mutants. *Genetics* 147, 1107-1130.
- 396 Yamamoto, D., Koganezawa, M., 2013. Genes and circuits of courtship behaviour  
397 in *Drosophila* males. *Nature Reviews Neuroscience* 14, 681-692.
- 398 Yu, J.Y., Kanai, M.I., Demir, E., Jefferis, G.S.X.E., Dickson, B.J., 2010. Cellular  
399 Organization of the Neural Circuit that Drives *Drosophila* Courtship Behavior.  
400 *Current Biology* 20, 1602-1614.

401

402

403 **Figure legends**

404

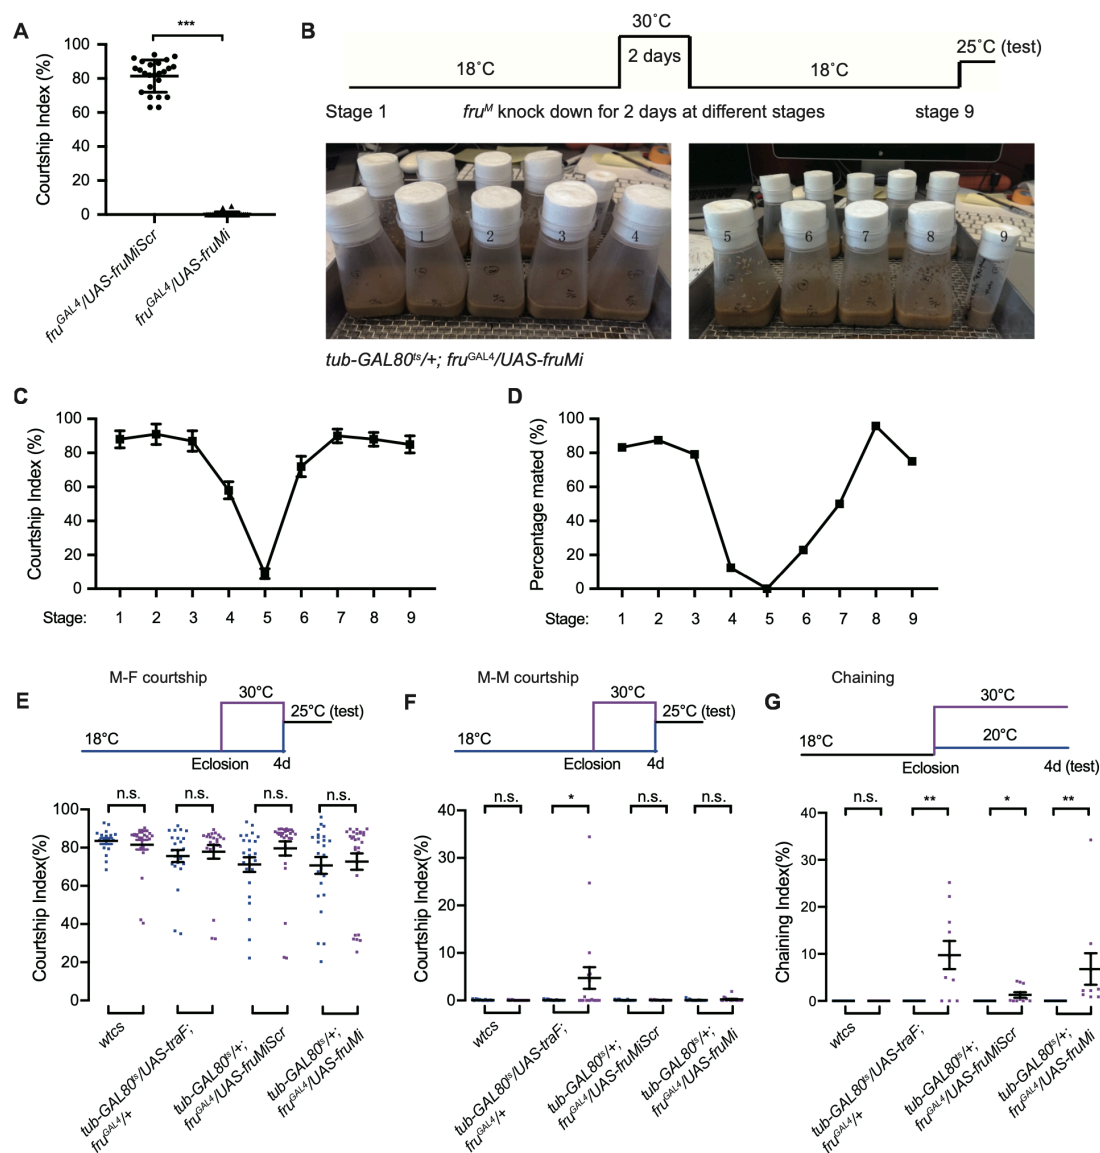

405

406 **Figure 1.** Distinct roles of *fru<sup>M</sup>* during development and adulthood in regulating male

407 courtship. **A:** Knocking down *fru<sup>M</sup>* using RNAi throughout development and

408 adulthood eliminated male courtship towards virgin females.  $n = 24$  for each.  $***p <$

409  $0.001$ , unpaired t-test. **B:** A schematic of genetic strategy to knock down *fru<sup>M</sup>* at

410 different developmental stages for 2 days. Stages 1 to 9 refer to specific

411 developmental stages from embryos to adults with interval of 2 days. **C and D:**

412 Courtship indices of males with *fru<sup>M</sup>* knocked down at specific developmental stages  
413 as indicated above towards virgin females. Males with *fru<sup>M</sup>* knocked down at stage 5  
414 for 2 days (a period of pupation from stage 5 to 6, see above picture) rarely courted  
415 virgin females (**C**), and none successfully mated (**D**). Knocking down *fru<sup>M</sup>* at stages  
416 near 5 (e.g., stage 4 or 6) also partially impairs courtship and mating success.  
417 Knocking down *fru<sup>M</sup>* at stage 9 (adult) has no obvious effect on courtship and mating.  
418  $n = 24$  for each. **E-G**: Knocking down *fru<sup>M</sup>* specifically during adulthood slightly  
419 increased male-male courtship behaviors. For male-female courtship (**E**),  $n = 17, 26,$   
420  $23, 23, 24, 27, 24$  and  $28$  respectively (from left to right), n.s., not significant,  
421 unpaired t-test. For single-pair male-male courtship (**F**),  $n = 18$  for each. n.s., not  
422 significant,  $*p < 0.05$ , unpaired t-test. For male chaining among 8 males as a group  
423 (**G**),  $n = 8, 8, 8, 10, 8, 9, 8$  and  $9$  respectively (from left to right). n.s., not significant,  
424  $*p < 0.05$ ,  $**p < 0.01$ , Mann-Whitney test. Error bars indicate SEM.  
425

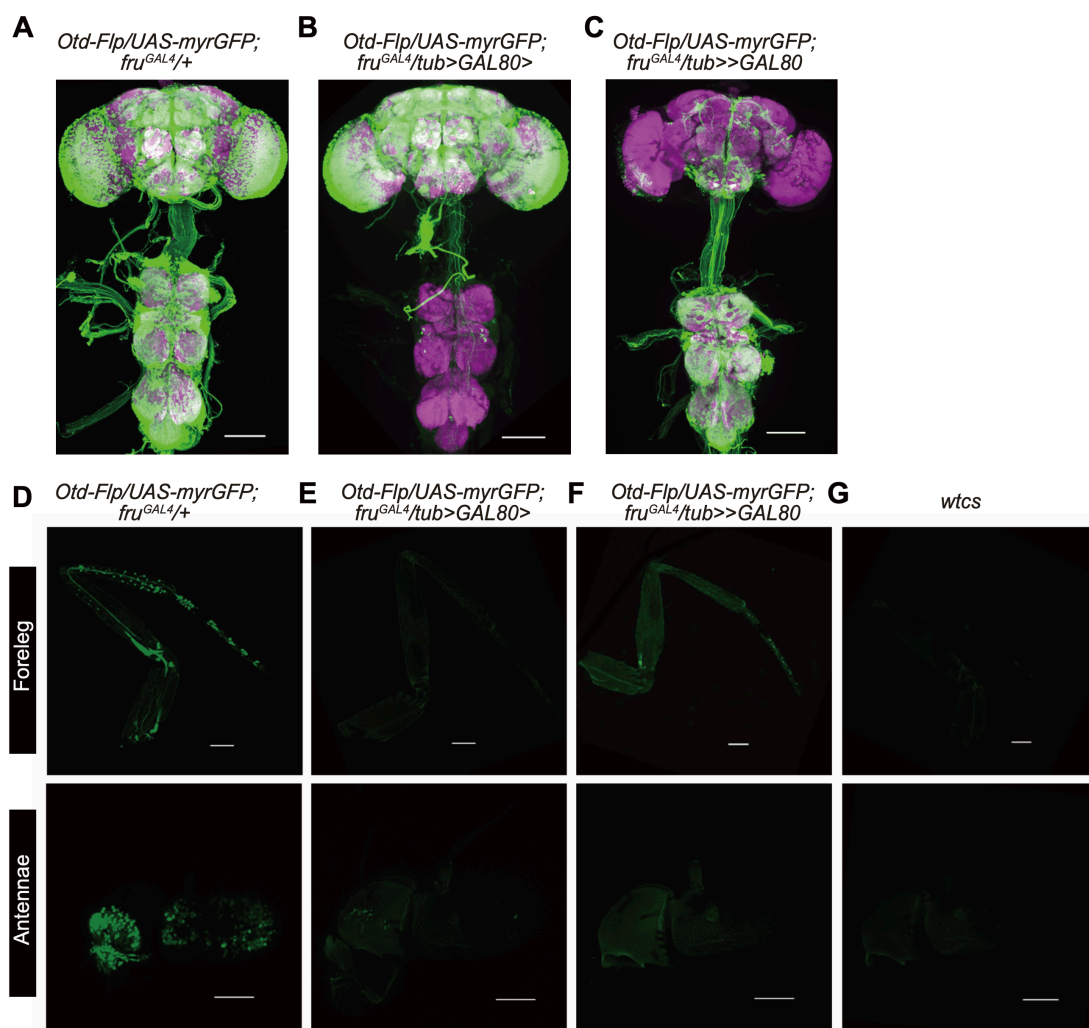

426

427 **Figure 2.** Dividing *fru<sup>M</sup>* expression into two complementary parts. A: Expression  
428 pattern of the *fru<sup>M</sup>* circuitry revealed by *fru<sup>GAL4</sup>* driving *UAS-myrGFP* (green), co-  
429 stained with nc82 (magenta). B and C: Genetic strategy to divide *fru<sup>M</sup>* neurons (green)  
430 into two parts. Scale bars above, 100 $\mu$ m. D-G: Expression pattern of *fru<sup>GAL4</sup>* driving  
431 *UAS-myrGFP* (green) in forelegs (scale bars, 100 mm) and antennae (scale bars, 50  
432 mm) in males with indicated genotypes. Representative of 5 samples each.

433

434

435

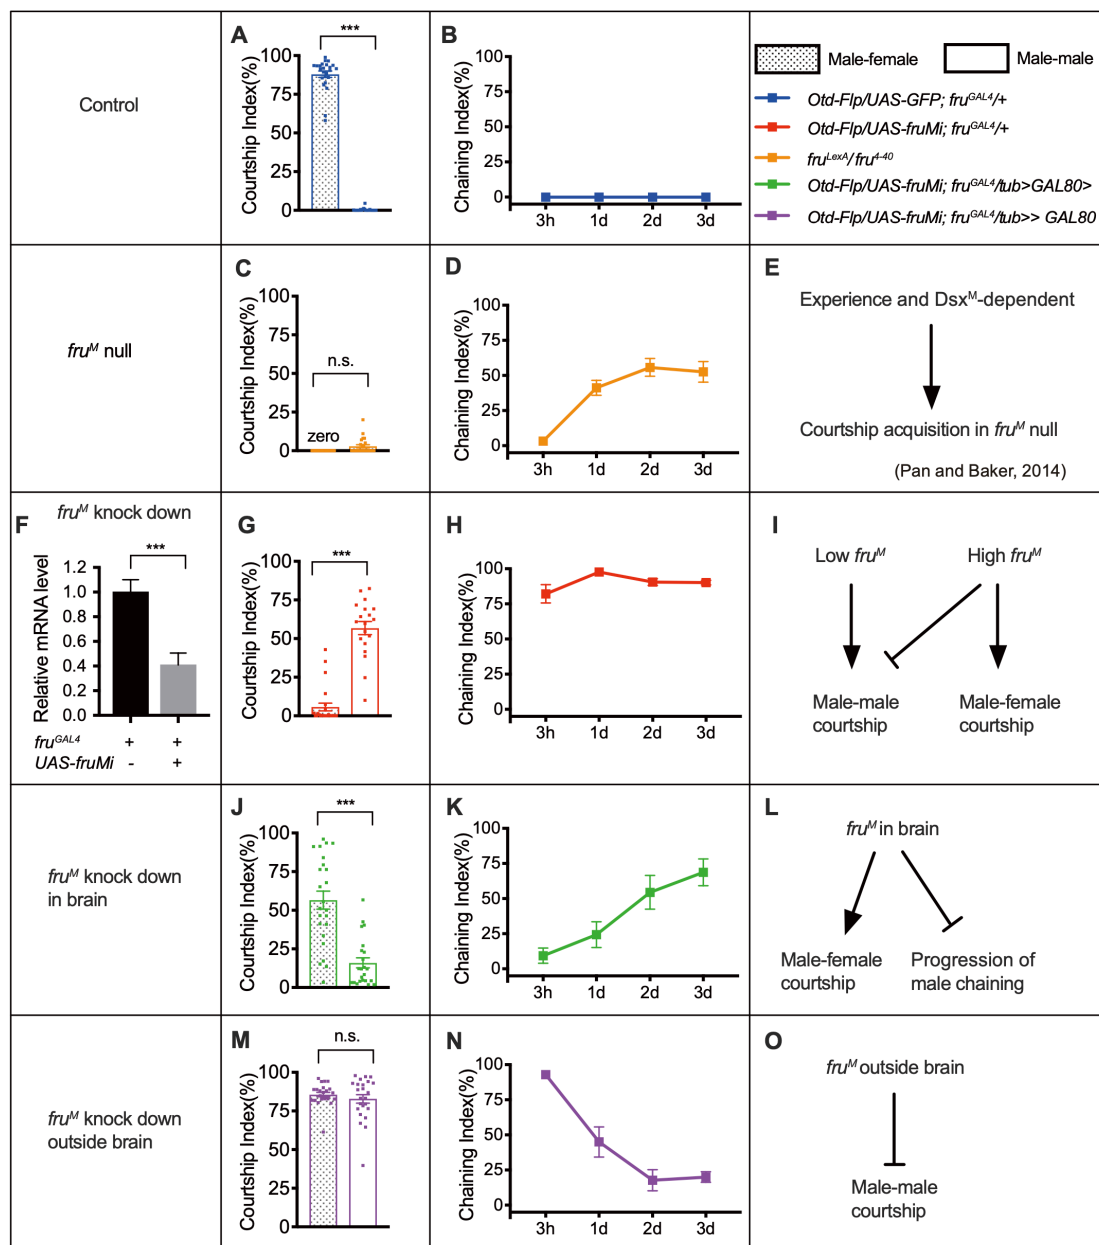

436

437 **Figure 3. *fru<sup>M</sup>* tunes functional flexibility of the *fru<sup>M</sup>* circuitry.** **A and B:** Wild-type  
 438 males courted intensively towards virgin females (**A**, left bar), but rarely courted  
 439 males (**A**, right bar) or displayed chaining behavior in groups of 8 males (**B**).  $n = 24$ ,  
 440 24, 8 respectively. \*\*\* $p < 0.001$ , unpaired t-test. **C:** *fru<sup>LexA</sup>/fru<sup>4-40</sup>* (*fru<sup>M</sup>* null) males  
 441 rarely courted either females or males.  $n = 24$  for each. n.s., not significant, unpaired  
 442 t-test. **D:** *fru<sup>LexA</sup>/fru<sup>4-40</sup>* males did not show chaining behavior after 3-hr group-  
 443 housing, but developed intensive chaining behavior after 1-3 days.  $n = 8$ . **E:** A

444 summary of courtship acquisition independent of *fru<sup>M</sup>*. **F:** RNAi against *fru<sup>M</sup>*  
445 efficiently decreased but not fully eliminated *fru<sup>M</sup>* expression.  $n = 3$ . \*\*\* $p < 0.001$ ,  
446 Mann-Whitney U test. **G:** Knocking down *fru<sup>M</sup>* in all *fru<sup>GAL4</sup>* neurons generated males  
447 that have reversed sexual orientation such that they rarely courted females but  
448 intensively courted males.  $n = 24$  and 19 respectively. \*\*\* $p < 0.001$ , unpaired t-test.  
449 **H:** Males with *fru<sup>M</sup>* knocked down in all *fru<sup>GAL4</sup>* neurons showed intensive chaining  
450 behavior at all time points (from 3 hours to 3 days upon group-housing).  $n = 7$ . **I:**  
451 Distinct roles of low *fru<sup>M</sup>* (RNAi) and high *fru<sup>M</sup>* (wild-type) in regulating male-male  
452 and male-female courtship. **J:** Males with *fru<sup>M</sup>* knocked down in *fru<sup>GAL4</sup>* neurons in  
453 the brain had a lower level of courtship towards females, but their sexual orientation  
454 was not changed.  $n = 24$  and 23 respectively. \*\*\* $p < 0.001$ , unpaired t-test. **K:** Males  
455 with *fru<sup>M</sup>* knocked down in *fru<sup>GAL4</sup>* neurons in brain showed low male chaining  
456 behavior initially but increasing levels of chaining behavior over 1-3 days.  $n = 6$ . **L:** A  
457 summary of the role of *fru<sup>M</sup>* in brain in promoting male-female courtship and  
458 suppressing the experience-dependent acquisition or progression of male chaining  
459 behavior. **M:** Males with *fru<sup>M</sup>* knocked down in *fru<sup>GAL4</sup>* neurons outside brain  
460 generated bisexual males that have intensive male-female and male-male courtship.  $n$   
461 = 24 for each. n.s., not significant, unpaired t-test. **N:** Males with *fru<sup>M</sup>* knocked down  
462 in *fru<sup>GAL4</sup>* neurons outside brain showed high male chaining behavior initially, but  
463 decreased levels of chaining behavior over 1-3 days.  $n = 8$ . **O:** A summary of the role

464 of *fru<sup>M</sup>* outside brain in suppressing male-male courtship behavior. Error bars indicate

465 SEM.

466

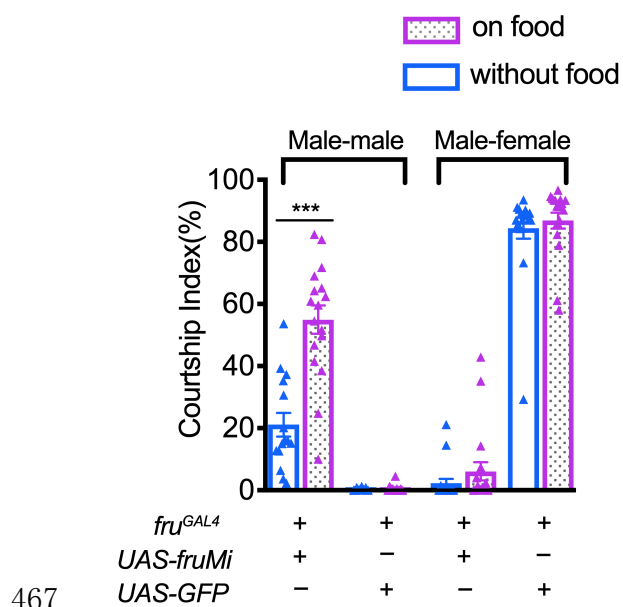

468 **Figure 3—figure supplement 1.** Comparison of male courtship with or without food.

469 Male-male courtship in *fru<sup>M</sup>* knocked down males is higher in the presence of food. *n*

470 = 15, 17, 15, 18, 18, 18, 18 and 18 from left to right respectively. \*\*\**p* < 0.001,

471 unpaired t-test. Error bars indicate SEM.

472



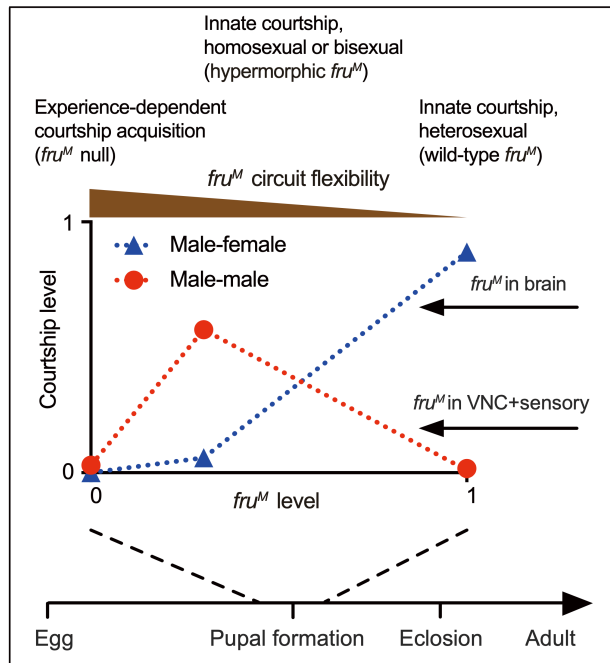

473

474 **Figure 4.** A summary of *fru<sup>M</sup>* function in male courtship. Firstly, *fru<sup>M</sup>* is largely  
475 required during a specific developmental period for courtship, and plays a minor role  
476 during adulthood; secondly, the sex circuitry without *fru<sup>M</sup>* or with different levels of  
477 *fru<sup>M</sup>* has different properties such that males would have experience-dependent  
478 courtship acquisition, or innate courtship but with different sexual orientation. Such  
479 flexibility of the sex circuitry is tuned by different *fru<sup>M</sup>* expression. Red circles and  
480 blue triangles represent corresponding *fru<sup>M</sup>* levels and courtship levels (red: male-  
481 male courtship; blue: male-female courtship).

482

483

484

485
